# Supplementary material for: Transcriptome analysis of tertiary lymphoid structures (TLSs)-related genes reveals prognostic value and immunotherapeutic potential in cancer
Source: publisher site journal article supplement (doi:10.1515/oncologie-2023-0372), 2023-11-24
Supplement: Supplementary file 1 [file Table_S1.xlsx]

## Sheet: Sheet 1
List of TLS-related genes
hgnc_symbol	ensembl_gene_id	chromosome_name	start_position	end_position	description
AICDA	ENSG00000111732	12	8602155	8613242	activation induced cytidine deaminase [Source:HGNC Symbol;Acc:HGNC:13203]
CCL18	ENSG00000275385	17	36064272	36072032	C-C motif chemokine ligand 18 [Source:HGNC Symbol;Acc:HGNC:10616]
CCL19	ENSG00000172724	9	34689570	34691276	C-C motif chemokine ligand 19 [Source:HGNC Symbol;Acc:HGNC:10617]
CCL2	ENSG00000108691	17	34255274	34257208	C-C motif chemokine ligand 2 [Source:HGNC Symbol;Acc:HGNC:10618]
CCL20	ENSG00000115009	2	227805739	227817564	C-C motif chemokine ligand 20 [Source:HGNC Symbol;Acc:HGNC:10619]
CCL21	ENSG00000137077	9	34709005	34710136	C-C motif chemokine ligand 21 [Source:HGNC Symbol;Acc:HGNC:10620]
CCL3	ENSG00000277632	17	36088256	36090169	C-C motif chemokine ligand 3 [Source:HGNC Symbol;Acc:HGNC:10627]
CCL4	ENSG00000275302	17	36103827	36105621	C-C motif chemokine ligand 4 [Source:HGNC Symbol;Acc:HGNC:10630]
CCL5	ENSG00000271503	17	35871491	35880793	C-C motif chemokine ligand 5 [Source:HGNC Symbol;Acc:HGNC:10632]
CCL8	ENSG00000108700	17	34319435	34321402	C-C motif chemokine ligand 8 [Source:HGNC Symbol;Acc:HGNC:10635]
CCR5	ENSG00000160791	3	46370946	46376206	C-C motif chemokine receptor 5 [Source:HGNC Symbol;Acc:HGNC:1606]
CCR6	ENSG00000112486	6	167111807	167139141	C-C motif chemokine receptor 6 [Source:HGNC Symbol;Acc:HGNC:1607]
CCR7	ENSG00000126353	17	40553769	40565472	C-C motif chemokine receptor 7 [Source:HGNC Symbol;Acc:HGNC:1608]
CD19	ENSG00000177455	16	28931965	28939342	CD19 molecule [Source:HGNC Symbol;Acc:HGNC:1633]
CD1D	ENSG00000158473	1	158178030	158186427	CD1d molecule [Source:HGNC Symbol;Acc:HGNC:1637]
CD200	ENSG00000091972	3	112332347	112362812	CD200 molecule [Source:HGNC Symbol;Acc:HGNC:7203]
CD38	ENSG00000004468	4	15778275	15853232	CD38 molecule [Source:HGNC Symbol;Acc:HGNC:1667]
CD3E	ENSG00000198851	11	118304730	118316175	CD3 epsilon subunit of T-cell receptor complex [Source:HGNC Symbol;Acc:HGNC:1674]
CD4	ENSG00000010610	12	6786858	6820799	CD4 molecule [Source:HGNC Symbol;Acc:HGNC:1678]
CD40	ENSG00000101017	20	46118271	46129863	CD40 molecule [Source:HGNC Symbol;Acc:HGNC:11919]
CD5	ENSG00000110448	11	61102489	61127852	CD5 molecule [Source:HGNC Symbol;Acc:HGNC:1685]
CD79B	ENSG00000007312	17	63928738	63932336	CD79b molecule [Source:HGNC Symbol;Acc:HGNC:1699]
CD83	ENSG00000112149	6	14117256	14136918	CD83 molecule [Source:HGNC Symbol;Acc:HGNC:1703]
CD86	ENSG00000114013	3	122055362	122121139	CD86 molecule [Source:HGNC Symbol;Acc:HGNC:1705]
CD8A	ENSG00000153563	2	86784610	86808396	CD8a molecule [Source:HGNC Symbol;Acc:HGNC:1706]
CETP	ENSG00000087237	16	56961923	56983845	cholesteryl ester transfer protein [Source:HGNC Symbol;Acc:HGNC:1869]
CR1	ENSG00000203710	1	207496147	207641765	complement C3b/C4b receptor 1 (Knops blood group) [Source:HGNC Symbol;Acc:HGNC:2334]
CR2	ENSG00000117322	1	207453024	207489895	complement C3d receptor 2 [Source:HGNC Symbol;Acc:HGNC:2336]
CSF2	ENSG00000164400	5	132073789	132076170	colony stimulating factor 2 [Source:HGNC Symbol;Acc:HGNC:2434]
CTLA4	ENSG00000163599	2	203853888	203873965	cytotoxic T-lymphocyte associated protein 4 [Source:HGNC Symbol;Acc:HGNC:2505]
CXCL10	ENSG00000169245	4	76021118	76023497	C-X-C motif chemokine ligand 10 [Source:HGNC Symbol;Acc:HGNC:10637]
CXCL11	ENSG00000169248	4	76033682	76041415	C-X-C motif chemokine ligand 11 [Source:HGNC Symbol;Acc:HGNC:10638]
CXCL13	ENSG00000156234	4	77511753	77611834	C-X-C motif chemokine ligand 13 [Source:HGNC Symbol;Acc:HGNC:10639]
CXCL9	ENSG00000138755	4	76001275	76007509	C-X-C motif chemokine ligand 9 [Source:HGNC Symbol;Acc:HGNC:7098]
CXCR3	ENSG00000186810	X	71615916	71618511	C-X-C motif chemokine receptor 3 [Source:HGNC Symbol;Acc:HGNC:4540]
CXCR5	ENSG00000160683	11	118883892	118897787	C-X-C motif chemokine receptor 5 [Source:HGNC Symbol;Acc:HGNC:1060]
EIF1AY	ENSG00000198692	Y	20575776	20593154	eukaryotic translation initiation factor 1A Y-linked [Source:HGNC Symbol;Acc:HGNC:3252]
FBLN7	ENSG00000144152	2	112138385	112188218	fibulin 7 [Source:HGNC Symbol;Acc:HGNC:26740]
FCER2	ENSG00000104921	19	7688758	7702146	Fc epsilon receptor II [Source:HGNC Symbol;Acc:HGNC:3612]
GFI1	ENSG00000162676	1	92473043	92486925	growth factor independent 1 transcriptional repressor [Source:HGNC Symbol;Acc:HGNC:4237]
GNLY	ENSG00000115523	2	85685175	85698852	granulysin [Source:HGNC Symbol;Acc:HGNC:4414]
GZMB	ENSG00000100453	14	24630954	24634267	granzyme B [Source:HGNC Symbol;Acc:HGNC:4709]
GZMH	ENSG00000100450	14	24606480	24609699	granzyme H [Source:HGNC Symbol;Acc:HGNC:4710]
HAVCR2	ENSG00000135077	5	157085422	157142869	hepatitis A virus cellular receptor 2 [Source:HGNC Symbol;Acc:HGNC:18437]
HLA-A	ENSG00000206503	6	29941260	29949572	major histocompatibility complex, class I, A [Source:HGNC Symbol;Acc:HGNC:4931]
HLA-B	ENSG00000234745	6	31353872	31367067	major histocompatibility complex, class I, B [Source:HGNC Symbol;Acc:HGNC:4932]
HLA-C	ENSG00000204525	6	31268749	31272130	major histocompatibility complex, class I, C [Source:HGNC Symbol;Acc:HGNC:4933]
HLA-DPA1	ENSG00000231389	6	33064569	33080775	major histocompatibility complex, class II, DP alpha 1 [Source:HGNC Symbol;Acc:HGNC:4938]
HLA-DPB1	ENSG00000223865	6	33075990	33089696	major histocompatibility complex, class II, DP beta 1 [Source:HGNC Symbol;Acc:HGNC:4940]
HLA-DQA1	ENSG00000196735	6	32628179	32647062	major histocompatibility complex, class II, DQ alpha 1 [Source:HGNC Symbol;Acc:HGNC:4942]
HLA-DQB1	ENSG00000179344	6	32659467	32668383	major histocompatibility complex, class II, DQ beta 1 [Source:HGNC Symbol;Acc:HGNC:4944]
HLA-DRA	ENSG00000204287	6	32439878	32445046	major histocompatibility complex, class II, DR alpha [Source:HGNC Symbol;Acc:HGNC:4947]
HLA-DRB1	ENSG00000196126	6	32577902	32589848	major histocompatibility complex, class II, DR beta 1 [Source:HGNC Symbol;Acc:HGNC:4948]
HLA-E	ENSG00000204592	6	30489509	30494194	major histocompatibility complex, class I, E [Source:HGNC Symbol;Acc:HGNC:4962]
HLA-F	ENSG00000204642	6	29722775	29738528	major histocompatibility complex, class I, F [Source:HGNC Symbol;Acc:HGNC:4963]
HLA-G	ENSG00000204632	6	29826967	29831125	major histocompatibility complex, class I, G [Source:HGNC Symbol;Acc:HGNC:4964]
ICOS	ENSG00000163600	2	203936763	203961577	inducible T cell costimulator [Source:HGNC Symbol;Acc:HGNC:5351]
IGSF6	ENSG00000140749	16	21639550	21652608	immunoglobulin superfamily member 6 [Source:HGNC Symbol;Acc:HGNC:5953]
IL10	ENSG00000136634	1	206767602	206774541	interleukin 10 [Source:HGNC Symbol;Acc:HGNC:5962]
IL1R1	ENSG00000115594	2	102064544	102179874	interleukin 1 receptor type 1 [Source:HGNC Symbol;Acc:HGNC:5993]
IL1R2	ENSG00000115590	2	101991960	102028544	interleukin 1 receptor type 2 [Source:HGNC Symbol;Acc:HGNC:5994]
IL2RA	ENSG00000134460	10	6010689	6062370	interleukin 2 receptor subunit alpha [Source:HGNC Symbol;Acc:HGNC:6008]
IRF4	ENSG00000137265	6	391739	411443	interferon regulatory factor 4 [Source:HGNC Symbol;Acc:HGNC:6119]
LAG3	ENSG00000089692	12	6772512	6778455	lymphocyte activating 3 [Source:HGNC Symbol;Acc:HGNC:6476]
LAMP3	ENSG00000078081	3	183122215	183163839	lysosomal associated membrane protein 3 [Source:HGNC Symbol;Acc:HGNC:14582]
LAT	ENSG00000213658	16	28984826	28990784	linker for activation of T cells [Source:HGNC Symbol;Acc:HGNC:18874]
MS4A1	ENSG00000156738	11	60455846	60470752	membrane spanning 4-domains A1 [Source:HGNC Symbol;Acc:HGNC:7315]
PDCD1	ENSG00000188389	2	241849884	241858894	programmed cell death 1 [Source:HGNC Symbol;Acc:HGNC:8760]
PTGDS	ENSG00000107317	9	136975092	136981742	prostaglandin D2 synthase [Source:HGNC Symbol;Acc:HGNC:9592]
RBP5	ENSG00000139194	12	7115736	7128889	retinol binding protein 5 [Source:HGNC Symbol;Acc:HGNC:15847]
SDC1	ENSG00000115884	2	20200797	20225433	syndecan 1 [Source:HGNC Symbol;Acc:HGNC:10658]
SELL	ENSG00000188404	1	169690665	169711702	selectin L [Source:HGNC Symbol;Acc:HGNC:10720]
SGPP2	ENSG00000163082	2	222424543	222562621	sphingosine-1-phosphate phosphatase 2 [Source:HGNC Symbol;Acc:HGNC:19953]
SH2D1A	ENSG00000183918	X	124227868	124373197	SH2 domain containing 1A [Source:HGNC Symbol;Acc:HGNC:10820]
SKAP1	ENSG00000141293	17	48133442	48430275	src kinase associated phosphoprotein 1 [Source:HGNC Symbol;Acc:HGNC:15605]
STAT5A	ENSG00000126561	17	42287547	42311943	signal transducer and activator of transcription 5A [Source:HGNC Symbol;Acc:HGNC:11366]
TIGIT	ENSG00000181847	3	114276913	114310288	T cell immunoreceptor with Ig and ITIM domains [Source:HGNC Symbol;Acc:HGNC:26838]
TNFRSF17	ENSG00000048462	16	11965210	11968068	TNF receptor superfamily member 17 [Source:HGNC Symbol;Acc:HGNC:11913]
TRAF6	ENSG00000175104	11	36483769	36510272	TNF receptor associated factor 6 [Source:HGNC Symbol;Acc:HGNC:12036]

## Sheet: Sheet 2
List of EMT-related genes
TGFBR3
ENG
AKNA
TGFBR3L
RBPJ
DDX5
FGFR2
TGFB2
TGFBR1
TGFB1
PTPN21
NOTCH4
SNAI2
DLG5
FAM83D
HIF1A
BMP2
NFATC1
EPB41L5
HMGA2
WNT4
ROCK1
CUL7
FLNA
DDX17
SLC39A6
STAT3
ERBB2
LOXL2
FGFR1
BMP7
SOX9
LOXL3
WNT5A
AMELX
NOTCH1
HGF
GSK3B
TRIM28
NOG
HNRNPAB
WNT11
S100A4
LEF1
GSK3A
RFLNB
FOXF2
CTNNB1
PPP3R1
SNAI1
ROCK2
MSX1
TRIP10

## Sheet: Sheet 3
List of cell cycle-related genes
G1S	G2M
MCM5	HMGB2
PCNA	CDK1
TYMS	NUSAP1
FEN1	UBE2C
MCM2	BIRC5
MCM4	TPX2
RRM1	TOP2A
UNG	NDC80
GINS2	CKS2
MCM6	NUF2
CDCA7	CKS1B
DTL	MKI67
PRIM1	TMPO
UHRF1	CENPF
MLF1IP	TACC3
HELLS	FAM64A
RFC2	SMC4
RPA2	CCNB2
NASP	CKAP2L
RAD51AP1	CKAP2
GMNN	AURKB
WDR76	BUB1
SLBP	KIF11
CCNE2	ANP32E
UBR7	TUBB4B
POLD3	GTSE1
MSH2	KIF20B
ATAD2	HJURP
RAD51	CDCA3
RRM2	HN1
CDC45	CDC20
CDC6	TTK
EXO1	CDC25C
TIPIN	KIF2C
DSCC1	RANGAP1
BLM	NCAPD2
CASP8AP2	DLGAP5
USP1	CDCA2
CLSPN	CDCA8
POLA1	ECT2
CHAF1B	KIF23
BRIP1	HMMR
E2F8	AURKA
	PSRC1
	ANLN
	LBR
	CKAP5
	CENPE
	CTCF
	NEK2
	G2E3
	GAS2L3
	CBX5
	CENPA
