# Supplementary material for: Transcriptome analysis of tertiary lymphoid structures (TLSs)-related genes reveals prognostic value and immunotherapeutic potential in cancer
Source: publisher site journal article supplement (doi:10.1515/oncologie-2023-0372), 2023-11-24
Supplement: Supplementary file 2 [file Table_S2.xlsx]

## Sheet: Sheet 1
Table S2. Overview of publicly available cohorts for this study
Source	CancerType	Study.Name	Sample.Size	Gender	Days.To.Last.Follow_Up (days)	Vital.Status
TCGA	ACC	Adrenocortical carcinoma	79 (Normal: 0; Tumor: 79)	Female: 48; Male: 31	0%: 253; 25%: 890.5; 50%: 1358; 75%: 2177	Alive: 51; Dead: 28
	BLCA	Bladder Urothelial Carcinoma	433 (Normal: 19; Tumor: 414)	Female: 118; Male: 315	0%: 0; 25%: 270.25; 50%: 524.5; 75%: 1043.25	Alive: 237; Dead: 195
	BRCA	Breast invasive carcinoma	1222 (Normal: 113; Tumor: 1109)	Female: 1208; Male: 13	0%: 0; 25%: 435; 50%: 785; 75%: 1604	Alive: 1020; Dead: 201
	CESC	Cervical squamous cell carcinoma and endocervical adenocarcinoma	309 (Normal: 3; Tumor: 306)	Female: 309; Male: NA	0%: 0; 25%: 287; 50%: 636; 75%: 1263	Alive: 235; Dead: 74
	CHOL	Cholangiocarcinoma	45 (Normal: 9; Tumor: 36)	Female: 23; Male: 22	0%: 0; 25%: 168; 50%: 709; 75%: 1229	Alive: 22; Dead: 23
	COAD	Colon adenocarcinoma	521 (Normal: 41; Tumor: 480)	Female: 247; Male: 272	0%: 0; 25%: 383; 50%: 670.5; 75%: 1088.5	Alive: 404; Dead: 115
	DLBC	Lymphoid Neoplasm Diffuse Large B-cell Lymphoma	48 (Normal: 0; Tumor: 48)	Female: 26; Male: 22	0%: 0; 25%: 441.5; 50%: 832; 75%: 1581	Alive: 39; Dead: 9
	ESCA	Esophageal carcinoma	173 (Normal: 11; Tumor: 162)	Female: 26; Male: 147	0%: 1; 25%: 191; 50%: 400; 75%: 639	Alive: 105; Dead: 68
	GBM	Glioblastoma multiforme	174 (Normal: 5; Tumor: 169)	Female: 59; Male: 109	0%: 0; 25%: 139.5; 50%: 290; 75%: 473	Alive: 30; Dead: 136
	HNSC	Head and Neck squamous cell carcinoma	546 (Normal: 44; Tumor: 502)	Female: 148; Male: 398	0%: 0; 25%: 409.5; 50%: 713; 75%: 1283	Alive: 294; Dead: 252
	KICH	Kidney Chromophobe	89 (Normal: 24; Tumor: 65)	Female: 38; Male: 51	0%: 30; 25%: 1204.25; 50%: 2650; 75%: 3138.25	Alive: 75; Dead: 14
	KIRC	Kidney renal clear cell carcinoma	611 (Normal: 72; Tumor: 539)	Female: 206; Male: 405	0%: 0; 25%: 693; 50%: 1434; 75%: 2210.25	Alive: 411; Dead: 200
	KIRP	Kidney renal papillary cell carcinoma	321 (Normal: 32; Tumor: 289)	Female: 87; Male: 234	0%: 0; 25%: 403; 50%: 767.5; 75%: 1533	Alive: 270; Dead: 51
	LGG	Brain Lower Grade Glioma	529 (Normal: 0; Tumor: 529)	Female: 239; Male: 289	0%: 0; 25%: 381; 50%: 629; 75%: 1166.25	Alive: 390; Dead: 137
	LIHC	Liver hepatocellular carcinoma	424 (Normal: 50; Tumor: 374)	Female: 143; Male: 281	0%: 0; 25%: 329.5; 50%: 591; 75%: 1086.5	Alive: 258; Dead: 164
	LUAD	Lung adenocarcinoma	594 (Normal: 59; Tumor: 535)	Female: 320; Male: 274	0%: 0; 25%: 390.75; 50%: 655; 75%: 1129	Alive: 376; Dead: 218
	LUSC	Lung squamous cell carcinoma	551 (Normal: 49; Tumor: 502)	Female: 145; Male: 406	0%: 0; 25%: 240; 50%: 652; 75%: 1251.5	Alive: 304; Dead: 247
	MESO	Mesothelioma	86 (Normal: 0; Tumor: 86)	Female: 15; Male: 71	0%: 0; 25%: 256; 50%: 501; 75%: 1150	Alive: 13; Dead: 73
	OV	Ovarian serous cystadenocarcinoma	379 (Normal: 0; Tumor: 379)	Female: 379; Male: NA	0%: 8; 25%: 371.75; 50%: 923.5; 75%: 1564.75	Alive: 147; Dead: 232
	PAAD	Pancreatic adenocarcinoma	182 (Normal: 4; Tumor: 178)	Female: 82; Male: 100	0%: 0; 25%: 198; 50%: 404; 75%: 711	Alive: 88; Dead: 94
	PCPG	Pheochromocytoma and Paraganglioma	186 (Normal: 3; Tumor: 183)	Female: 103; Male: 83	0%: 2; 25%: 325.75; 50%: 764; 75%: 1291	Alive: 178; Dead: 8
	PRAD	Prostate adenocarcinoma	551 (Normal: 52; Tumor: 499)	Female: NA; Male: 551	0%: 23; 25%: 541.5; 50%: 928; 75%: 1443	Alive: 539; Dead: 10
	READ	Rectum adenocarcinoma	177 (Normal: 10; Tumor: 167)	Female: 82; Male: 94	0%: 0; 25%: 252; 50%: 556; 75%: 1035	Alive: 145; Dead: 31
	SARC	Sarcoma	265 (Normal: 2; Tumor: 263)	Female: 145; Male: 120	0%: 0; 25%: 534; 50%: 1015; 75%: 1872.25	Alive: 166; Dead: 99
	SKCM	Skin Cutaneous Melanoma	472 (Normal: 1; Tumor: 471)	Female: 179; Male: 293	0%: 0; 25%: 419.5; 50%: 1025; 75%: 2362	Alive: 247; Dead: 224
	STAD	Stomach adenocarcinoma	407 (Normal: 32; Tumor: 375)	Female: 144; Male: 263	0%: 0; 25%: 47; 50%: 411; 75%: 792	Alive: 247; Dead: 159
	TGCT	Testicular Germ Cell Tumors	156 (Normal: 0; Tumor: 156)	Female: NA; Male: 139	0%: 3; 25%: 705.5; 50%: 1382; 75%: 3190	Alive: 135; Dead: 4
	THCA	Thyroid carcinoma	568 (Normal: 58; Tumor: 510)	Female: 412; Male: 156	0%: 0; 25%: 542.5; 50%: 943.5; 75%: 1575	Alive: 548; Dead: 20
	THYM	Thymoma	121 (Normal: 2; Tumor: 119)	Female: 59; Male: 62	0%: 4; 25%: 711.75; 50%: 1192.5; 75%: 1969	Alive: 112; Dead: 9
	UCEC	Uterine Corpus Endometrial Carcinoma	587 (Normal: 35; Tumor: 552)	Female: 575; Male: NA	0%: 0; 25%: 494.5; 50%: 902.5; 75%: 1610.5	Alive: 478; Dead: 97
	UCS	Uterine Carcinosarcoma	56 (Normal: 0; Tumor: 56)	Female: 56; Male: NA	0%: 0; 25%: 575.75; 50%: 828; 75%: 1647.5	Alive: 22; Dead: 34
	UVM	Uveal Melanoma	80 (Normal: 0; Tumor: 80)	Female: 35; Male: 45	0%: 4; 25%: 482.5; 50%: 795; 75%: 1171.5	Alive: 57; Dead: 23
Metabric	BRCA		1904 (Normal: 0; Tumor: 1904)	Female: 1904; Male: 0	0%: 0; 25%: 1824.75; 50%: 3447; 75%: 5534.25; 100%: 10656	Alive: 801; Dead: 1103
Chin et al.’s			112 (Normal: 0; Tumor: 112)	Female: 112; Male: 0	0%: 47.45; 25%: 1215.45; 50%: 2421.775; 75%: 3504; 100%: 5183	Alive: 76; Dead: 36
GSE20685			327 (Normal: 0; Tumor: 327)	Female: 327; Male: 0	0%: 146; 25%: 2171.75; 50%: 2956.5; 75%: 3796; 100%: 5146.5	Alive: 244; Dead: 83
GSE21653			266 (Normal: 0; Tumor: 266)	Female: 266; Male: 0	0%: 0; 25%: 841.05; 50%: 1587.45; 75%: 2694.825; 100%: 6668.7	Alive: 169; Dead: 83
GSE8894	LUAD		168 (Normal: 0; Tumor: 168)	Female: 34; Male: 104	0%: 28.00; 25%: 284.25; 50%: 10745.00; 75%: 1473.50; 100%: 4154.00	Alive: 69; Dead: 69
GSE31210			246 (Normal: 20; Tumor: 226)	Female: 130; Male: 116	0%: 221; 25%: 1245.5; 50%: 1744.5; 75%: 2049.5; 100%: 3863	Alive: 191; Dead: 35
GSE30219			307 (Normal: 0; Tumor: 307)	Female: 43; Male: 250; NTL: 14	0%: 0; 25%: 334.58; 50%: 1353.54; 75%: 3011.25; 100%: 7786.67	Alive: 107; Dead: 200
GSE19188	LUSC		156 (Normal: 65; Tumor: 91)	Female: 34; Male: 100; Not available: 22	0%: 2.1; 25%: 350.92; 50%: 911.1; 75%: 2375.325; 100%: 3815.1	Alive: 32; Dead: 50; Not available: 74
GSE41613	OSCC	Oral squamous cell carcinoma	97 (Normal: 0; Tumor: 97)	Female: 31; Male: 66	0%: 13.8; 25%: 510.6; 50%: 1632.3; 75%: 1996.8; 100%: 2550.9	Alive: 46; Dead: 51
IMvigor210 cohort	BLCA		348 (Normal: 0; Tumor: 348)	Female: 76; Male: 272	0%: 71.95; 25%: 1052.27; 50%: 2937.98; 75%: 6499.54; 100%: 8933.88	Alive: 116; Dead: 232
GSE91061	SKCM	Melanoma	73 (Normal: 0; Tumor: 73)	Not available	0%: 9.8; 25%: 226.8; 50%: 483.7; 75%: 840; 100%: 1148.7	Alive: 31; Dead: 42
GSE135222	NSCLC	Non-small cell lung cancer	27 (Normal: 0; Tumor: 27)	Female: 5; Male: 22	0%: 90; 25%: 1065; 50%: 1770; 75%: 5685; 100%: 18540	Alive: 6; Dead: 21
