# Supplementary material for: Transcriptome analysis of tertiary lymphoid structures (TLSs)-related genes reveals prognostic value and immunotherapeutic potential in cancer
Source: publisher site journal article supplement (doi:10.1515/oncologie-2023-0372), 2023-11-24
Supplement: Supplementary file 3 [file Table_S3.xlsx]

## Sheet: Sheet1
Table S3. Coefficients of the TLS-related prognostic model for pan-cancers
	coef	exp(coef)	se(coef)	z	p
CCL2	0.085411	1.08916	0.023962	3.564	0.000365
CCL5	0.085378	1.08913	0.032894	2.596	0.009443
CCL8	-0.011546	0.988521	0.034762	-0.332	0.739785
CCL18	-0.019347	0.980839	0.016827	-1.15	0.250252
CXCL9	0.038401	1.03915	0.026714	1.437	0.150592
CD200	-0.069934	0.932455	0.023771	-2.942	0.00326
FBLN7	-0.008558	0.991479	0.032447	-0.264	0.791972
SH2D1A	-0.192925	0.824544	0.079275	-2.434	0.014948
TIGIT	-0.369269	0.691239	0.092987	-3.971	7.15e-05
CCR5	-0.232826	0.792291	0.072479	-3.212	0.001317
CSF2	0.068997	1.07143	0.034714	1.988	0.046858
IL2RA	0.198808	1.21995	0.047799	4.159	3.19e-05
CD5	-0.049287	0.951908	0.051842	-0.951	0.341744
MS4A1	-0.012503	0.987575	0.053302	-0.235	0.814543
SDC1	0.041941	1.04283	0.017055	2.459	0.013928
IL1R2	0.10699	1.11292	0.021079	5.076	3.86e-07
IL10	0.070794	1.07336	0.05449	1.299	0.193874
CCL20	0.097066	1.10193	0.015848	6.125	9.08e-10
STAT5A	-0.024649	0.975652	0.033177	-0.743	0.457501
CCR7	0.003776	1.00378	0.039881	0.095	0.924572
LAMP3	0.052949	1.05438	0.022923	2.31	0.020897
CD79B	0.086648	1.09051	0.039804	2.177	0.02949
CD1D	-0.062347	0.939557	0.047856	-1.303	0.192646
EIF1AY	0.016038	1.01617	0.016962	0.945	0.344414
RBP5	-0.047035	0.954054	0.020496	-2.295	0.021745
PTGDS	0.068101	1.07047	0.016148	4.217	2.47e-05
CR1	0.017967	1.01813	0.079227	0.227	0.820591
CD3E	-0.107252	0.898299	0.063678	-1.684	0.092126
CD8A	0.124242	1.13229	0.051313	2.421	0.015468
CD86	0.186266	1.20474	0.065735	2.834	0.004603
GZMB	-0.063557	0.938421	0.033159	-1.917	0.055272
HAVCR2	0.179747	1.19691	0.046876	3.835	0.000126
HLA-DRB1	-0.072225	0.930322	0.039115	-1.846	0.064821
HLA-DPA1	0.04327	1.04422	0.040068	1.08	0.28018
HLA-G	-0.093	0.911194	0.026391	-3.524	0.000425
