# Supplementary material for: Transcriptome analysis of tertiary lymphoid structures (TLSs)-related genes reveals prognostic value and immunotherapeutic potential in cancer
Source: publisher site journal article supplement (doi:10.1515/oncologie-2023-0372), 2023-11-24
Supplement: Supplementary file 4 [file Table_S4.xlsx]

## Sheet: Sheet1
Table S4. Anti-human antibodies used in the immunofluorescence staining
Antibody	Catalogue	Clone	Company	City and Country
CD3	GA045207	poly	Gene Tech	Shanghai, China
CD20	GM075507	L26	Gene Tech	Shanghai, China
CD21	GT208707	E64	Gene Tech	Shanghai, China
CD23	GT209802	SP23​	Gene Tech	Shanghai, China
HLA-ABC	ab70328	EMR8-5	abcam	Shanghai, China
HLA-DR+DP+DQ	ab7856	CR3/43	abcam	Shanghai, China
HLA-E	ab2216	MEM-E/02	abcam	Shanghai, China
HLA-G	ab283260	EPR23298-97	abcam	Shanghai, China
